# Supplementary material for: Quantum loss sensing with two-mode squeezed vacuum state under noisy and lossy environment
Source: Research Square preprint supplement (doi:10.21203/rs.3.rs-2563568/v1), 2023-02-16
Supplement: Supplementary file 1 [file 7865dc1fba9645f9f467eda6.pdf]

# Quantum loss sensing with two-mode squeezed vacuum state under noisy and lossy environment—Supplementary Information

Sang-il Park and Changsuk Noh  
*Kyungpook National University, Daegu 41566, Korea*

Changhyoup Lee  
*Korea Research Institute of Standards and Science, Daejeon 34113, Korea*

## I. QUANTUM FISHER INFORMATION FOR GAUSSIAN STATES

The quantum Fisher information (QFI) can be calculated from the fidelity  $\mathcal{F}(\rho_T, \rho_{T+dT})$  between the two states  $\rho_T$  and  $\rho_{T+dT}$  and is given by [1]

$$H(T) = \frac{8[1 - \mathcal{F}(\rho_T, \rho_{T+dT})]}{dT^2}. \quad (1)$$

There is a well-known method of computing the fidelity of the Gaussian states [2]. For  $n$  bosonic modes described by quadrature operators  $\mathbf{Q} = (x_1, \dots, x_n, p_1, \dots, p_n)^T$ , the canonical commutation relations can be written as [3]

$$[\mathbf{Q}, \mathbf{Q}^T] = i\Omega_n, \quad \Omega_n := \begin{pmatrix} 0 & 1 \\ -1 & 0 \end{pmatrix} \otimes I_n, \quad (2)$$

where  $I_n$  is the  $n \times n$  identity matrix. The first- and second-order moments of Gaussian states can be written in terms of the mean ( $\mathbf{u}$ ) and the covariance matrix ( $V$ ) where

$$u_i = \langle Q_i \rangle, \quad (3)$$

$$V_{ij} = \frac{1}{2} \langle \{Q_i - u_i, Q_j - u_j\} \rangle. \quad (4)$$

Using a modified version of the covariance matrix  $W := -2Vi\Omega_n$ , the fidelity between two Gaussian states is given by

$$\mathcal{F}(\rho_1, \rho_2) = \mathcal{F}_0(V_1, V_2) \exp \left[ -\frac{1}{4} \delta_u^T (V_1 + V_2)^{-1} \delta_u \right], \quad (5)$$

where  $\delta_u := u_2 - u_1$  and  $\mathcal{F}_0(V_1, V_2)$  is given by [2, 4, 5].

$$\mathcal{F}_0^2(V_1, V_2) = \frac{1}{\sqrt{\Delta + \Lambda} - \sqrt{\Lambda}}, \quad (6)$$

for single-mode Gaussian states and

$$\mathcal{F}_0^2(V_1, V_2) = \frac{1}{\sqrt{\Gamma} + \sqrt{\Lambda} - \sqrt{(\sqrt{\Gamma} + \sqrt{\Lambda})^2 - \Delta}}, \quad (7)$$

for two-mode Gaussian states. Here, the symplectic invariants are defined as  $\Delta = \det(V_1 + V_2)$ ,  $\Gamma = 2^{2n} \det(\Omega_n V_1 \Omega_n V_2 - I/4)$ , and  $\Lambda = 2^{2n} \det(V_1 + i\Omega/2) \det(V_2 + i\Omega/2)$ .

## II. QUANTUM ENHANCEMENTS FOR $n_{\text{th}} = 0$

Figures S1(a) and (b) depict how Figs. 3 and 5 in the main text change, respectively, in the limit of vanishing thermal photon number, i.e.,  $n_{\text{th}} \rightarrow 0$ . For the original asymmetric setup (Fig. S1(a)), the ‘No enhancement’ region occupies a larger parameter space at the cost of reduced region for ‘coin’, while the region occupied by ‘diff’ stays more or less the same. The values of  $R_{\text{coin}}$  have decreased significantly from those at  $n_{\text{th}} = 0.1$ , while  $R_{\text{diff}}$  exhibits mixed behavior. The latter has increased when  $T$  is large and  $\gamma$  is small (bottom right corner), but has decreased

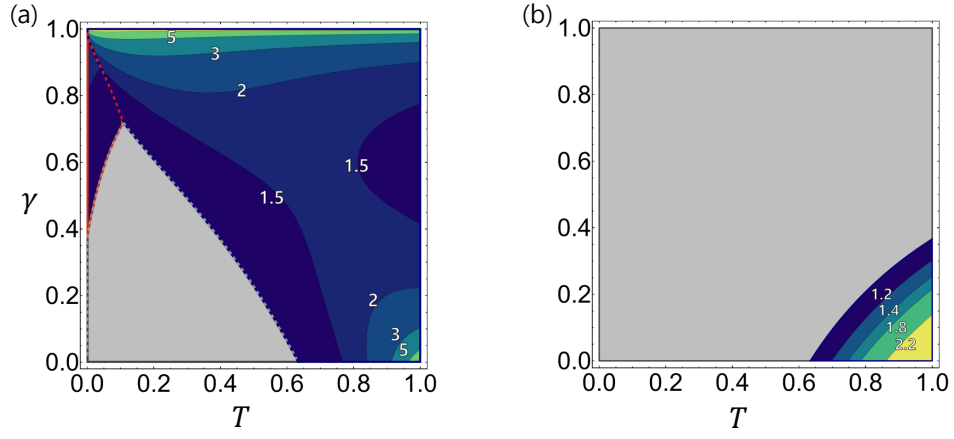

Fig. S1: Quantum enhancements achieved by the TMSV state as quantified by  $R_\kappa$  in (a) the original quantum setup and (b) the new quantum setup, for  $n_{\text{th}} = 0$ .

when  $\gamma$  is large (for all  $T$ ). The situation is similar for the alternative quantum setup, as shown in Fig. S1(b), except for the fact that the coincidence-counting scheme exhibits no quantum enhancement at all when  $n_{\text{th}} = 0$ .

- 
- [1] Braunstein, S. L. & Caves, C. M. Statistical distance and the geometry of quantum states. *Phys. Rev. Lett.* **72**, 3439 (1994).
  - [2] Banchi, L. Braunstein, S. L. & Pirandola, S. Quantum fidelity for arbitrary Gaussian states. *Phys. Rev. Lett.* **115**, 260501 (2015).
  - [3] Serafini, A. *Quantum Continuous Variables*. (CRC Press, 2017).
  - [4] Marian, P. & Marian, T. A. Uhlmann fidelity between two-mode Gaussian states. *Phys. Rev. A* **84**, 022340 (2012).
  - [5] Marian, P. & Marian, T. A. Quantum Fisher information on two manifolds of two-mode Gaussian states. *Phys. Rev. A* **93**, 052330 (2016).
